# Supplementary material for: Colpodella sp. (ATCC 50594) Life Cycle: Myzocytosis and Possible Links to the Origin of Intracellular Parasitism
Source: MDPI journal article supplement (doi:10.3390/tropicalmed6030127), 2021-07-11
Supplement: s1 [file Supplementary Table 1.pdf › Supplementary Table 1.pdf]

**Supplementary Table S1.** Summary of time course experiments 1-4 to determine the duration of *Colpodella* sp.ATCC 50594) life cycle.

| <b>Time Point</b> | <b>Description</b>                                                                                                                  |
|-------------------|-------------------------------------------------------------------------------------------------------------------------------------|
| T0= 0 hours       | Had a few <i>Parabodo</i> cysts and young <i>Colpodella</i> sp. cysts                                                               |
| T1= 4 hours       | A few <i>Parabodo</i> trophozoites                                                                                                  |
| T2= 8 hours       | A little more <i>Parabodo</i> trophozoites                                                                                          |
| T3= 12 hours      | Many <i>Parabodo</i> trophozoites                                                                                                   |
| T4= 16 hours      | Lots of <i>Parabodo</i> trophozoites                                                                                                |
| T5= 20 hours      | Many <i>Bodo</i> and a few <i>Colpodella</i> trophozoites                                                                           |
| T6= 24 hours      | More <i>Colpodella</i> sp. trophozoites and first attachments                                                                       |
| T7= 28 hours      | <i>Colpodella</i> sp. display very long attachments and <i>Parabodo</i> cysts starting to form, both species have many trophozoites |
| T8= 32 hours      | Some attachments and more <i>Parabodo</i> cysts forming, both species have many trophozoites                                        |
| T9= 36 hours      | Many <i>Parabodo</i> cyst, <i>Colpodella</i> sp. are fewer in number                                                                |
| T10= 5 days       | Identified <i>Parabodo</i> cysts                                                                                                    |
| T11= 10 days      | Many <i>Parabodo</i> cysts                                                                                                          |
