# Supplementary material for: Colpodella sp. (ATCC 50594) Life Cycle: Myzocytosis and Possible Links to the Origin of Intracellular Parasitism
Source: MDPI journal article supplement (doi:10.3390/tropicalmed6030127), 2021-07-11
Supplement: s1 [file Supplementary Table 2.pdf › Supplementary Table 2.pdf]

**Supplementary Table S2.** Time Course five observations during the most active parts of the *Colpodella* sp. (ATCC 50594) life cycle. Time point numbers correspond to hours/days cells were collected for staining.

| Time Point     | Description                                                                                                                                              |
|----------------|----------------------------------------------------------------------------------------------------------------------------------------------------------|
| T0 = 0 hours   | Had a few <i>Parabodo caudatus</i> cysts * (Need more sample)                                                                                            |
| T1 = 4 hours   | A few <i>Parabodo caudatus</i> trophozoites and cysts                                                                                                    |
| T2 = 8 hours   | A little more <i>P. caudatus</i> trophozoites                                                                                                            |
| T3 = 12 hours  | More <i>P. caudatus</i> trophozoites and <i>Colpodella</i> sp. mature cyst                                                                               |
| T4 = 16 hours  | Lots of <i>P. caudatus</i> trophozoites and first attachment, Saw <i>Colpodella</i> sp. early and late cyst                                              |
| T5 = 20 hours  | Many <i>P. caudatus</i> trophozoites and <i>Colpodella</i> sp. late cysts                                                                                |
| T6 = 22 hours  | Lots of <i>P. caudatus</i> trophozoites and some <i>Colpodella</i> sp. trophozoites, saw both early and mature cysts                                     |
| T7 = 24 hours  | <i>P. caudatus</i> trophozoites and <i>Colpodella</i> sp. attachments, early <i>Colpodella</i> cyst (2), mature <i>Colpodella</i> cyst (4)               |
| T8 = 25 hours  | <i>P. caudatus</i> trophozoites, many attachments, and saw a few <i>Colpodella</i> sp. early cysts                                                       |
| T9 = 26 hours  | <i>P. caudatus</i> trophozoites and <i>Colpodella</i> sp. attachments, many early <i>Colpodella</i> sp. cysts, <i>P. caudatus</i> start encysting        |
| T10 = 27 hours | <i>P. caudatus</i> trophozoites and cysts, some <i>Colpodella</i> sp. trophozoites with attachments, seeing <i>Colpodella</i> sp. encyst and early cysts |
| T11 = 28 hours | <i>P. caudatus</i> trophozoites and cysts, <i>Colpodella</i> sp. trophozoites and attachments, Most mature <i>Colpodella</i> sp. cysts                   |
| T12 = 29 hours | <i>P. caudatus</i> trophozoites and cysts, <i>Colpodella</i> sp. trophozoites and early cysts                                                            |
| T13 = 30 hours | More <i>P. caudatus</i> cysts than trophozoites, many <i>Colpodella</i> sp. attachments and saw some early cysts                                         |
| T14 = 32 hours | <i>P. caudatus</i> cysts and trophozoites, <i>Colpodella</i> sp. trophozoites with a few attachments, a few early and late cysts                         |
| T15 = 34 hours | <i>P. caudatus</i> cysts with a few trophozoites, one <i>Colpodella</i> sp. attachment, saw early <i>Colpodella</i> sp. cyst                             |
| T16 = 36 hours | <i>P. caudatus</i> cysts and a few <i>Colpodella</i> sp. trophozoites                                                                                    |
| T17 = 38 hours | <i>P. caudatus</i> cysts, saw a few <i>Colpodella</i> sp. trophozoites and mature cysts                                                                  |
| T18 = 40 hours | <i>P. caudatus</i> cysts                                                                                                                                 |
| T19 = 5 days   | A few <i>P. caudatus</i> cysts, saw <i>Colpodella</i> sp. mature cyst                                                                                    |
| T20 = 7 days   | A few <i>P. caudatus</i> cysts                                                                                                                           |
