# Supplementary material for: Colpodella sp. (ATCC 50594) Life Cycle: Myzocytosis and Possible Links to the Origin of Intracellular Parasitism
Source: Trop Med Infect Dis. 2021 Jul 11;6(3):127. doi: 10.3390/tropicalmed6030127 (PMC8293349; doi:10.3390/tropicalmed6030127)
Supplement: Supplementary file 1 [file tropicalmed-06-00127-s001.zip]

Archive with 10 entries (10 files):
- Supplementary Figure 1.tif
- Supplementary Figure 2.avi
- Supplementary Figure 3.tif
- Supplementary Figure 4.tif
- Supplementary Figure 5.avi
- Supplementary Figure 6.tif
- Supplementary Figure 7.tif
- Supplementary Table 1.pdf
- Supplementary Table 2.pdf
- Supplementary Table 3.pdf
